# Supplementary material for: Body Size Reductions in Nonmammalian Eutheriodont Therapsids (Synapsida) during the End-Permian Mass Extinction
Source: PubMed Central journal article supplement (PMC3911975; doi:10.1371/journal.pone.0087553), 2014-02-03
Supplement: pone.0087553.s002.pdf [file pone.0087553.s002.pdf]

## Appendix S2

**Appendix S2.** Outcrop area and sampled diversity of Karoo Basin theropcephalians and cynodonts.

| <b>Karoo Biozone</b>      | <b>Base (Ma)</b> | <b>Top (Ma)</b> | <b>Duration (Myr)</b> | <b>Outcrop area (total) (km<sup>2</sup>)</b> | <b>Outcrop area (productive) (km<sup>2</sup>)</b> | <b>#theroceph genera</b> | <b># cyno genera</b> |
|---------------------------|------------------|-----------------|-----------------------|----------------------------------------------|---------------------------------------------------|--------------------------|----------------------|
| <i>Cynognathus</i> AZ     | 248              | 241.2           | 6.8                   | 11,196                                       | 5,488                                             | 2                        | 8                    |
| <i>Lystrosaurus</i> AZ    | 252.3            | 248             | 4.3                   | 76,550                                       | 48,358                                            | 7                        | 4                    |
| <i>Dicynodon</i> AZ       | 255              | 252.3           | 2.7                   | 41,113                                       | 20,322                                            | 11                       | 3                    |
| <i>Cistecephalus</i> AZ   | 257              | 255             | 2.0                   | 41,082                                       | 31,360                                            | 8                        | 2                    |
| <i>Tropidostoma</i> AZ    | 259.5            | 257             | 2.5                   | 17,718                                       | 14,739                                            | 6                        | 2                    |
| <i>Pristerognathus</i> AZ | 262              | 259.5           | 2.5                   | 3,857                                        | 3,857                                             | 5                        | --                   |
| <i>Tapinocephalus</i> AZ  | 265.8            | 262             | 3.8                   | 21,043                                       | 15,806                                            | 7                        | --                   |
| <i>Eodicynodon</i> AZ     | 268              | 265.8           | 2.2                   | 1,286                                        | 1,066                                             | 2                        | --                   |

Ma, millions of years ago (mega-annum); Myr, million years; dates are estimates based on Abdala and Ribeiro (2010), Smith et al. (2012), and Rubidge et al. (2013); AZ, Assemblage Zone;

Outcrop area estimates from King (1991);

References: Abdala F, Ribeiro AM (2010) Distribution and diversity patterns of Triassic cynodonts (Therapsida, Cynodontia) in Gondwana. *Palaeogeogr Palaeoclimatol Palaeoecol* 286:202–217; Smith RMH, Rubidge BS, van der Walt M (2012) Therapsid biodiversity patterns and paleoenvironments of the Karoo Basin, South Africa. In: Chinsamy-Turan A, editor. *Forerunners of Mammals: Radiation, Histology, Biology*. Bloomington: Indiana University Press. pp. 31–62; Rubidge BS, Erwin DH, Ramezani J, Bowring SA, de Klerk WJ (2013) High-precision temporal calibration of Late Permian biostratigraphy: U-Pb constraints from the Karoo Supergroup, South Africa. *Geology* 41:363–366; King G (1991). Terrestrial tetrapods and the end Permian event: a comparison of analyses. *Hist Biol* 5:239–255.
