# Supplementary material for: Body Size Reductions in Nonmammalian Eutheriodont Therapsids (Synapsida) during the End-Permian Mass Extinction
Source: PubMed Central journal article supplement (PMC3911975; doi:10.1371/journal.pone.0087553), 2014-02-03
Supplement: pone.0087553.s003.pdf [file pone.0087553.s003.pdf]

## Appendix S3

**Appendix S3.** Age and clade rank data for therocephalian and cynodont subclades. Basal skull length measurements (BSL) are in mm.

| Eutheriodontia             | CR <sup>†</sup> | AR <sup>‡</sup> | MaxBSL | lnBSL | Voucher specimen/Source         |
|----------------------------|-----------------|-----------------|--------|-------|---------------------------------|
| Therocephalia              |                 |                 |        |       |                                 |
| <i>Lycosuchus</i> (CR1)    | 1               | 2               | 340    | 5.828 | SAM-PK-9084                     |
| Scylacosauridae (CR2)      |                 |                 |        |       |                                 |
| <i>Ictidosaurus</i>        | 2               | 1               | 168*   | 5.123 | Abdala et al. [72] (NMQR 2910)  |
| <i>Glanosuchus</i>         | 2               | 2               | 330    | 5.799 | UCMP 42669                      |
| <i>Pristerognathus</i>     | 2               | 2               | 262    | 5.568 | SAM-PK-11492                    |
| <i>Scylacosuchus</i> (CR3) | 3               | 3               | 250*   | 5.521 | Ivakhnenko [73] (PIN 2628/1)    |
| Akidnognathidae (CR4)      |                 |                 |        |       |                                 |
| <i>Annatherapsidus</i>     | 4               | 5               | 250*   | 5.521 | Ivakhnenko [73] (PIN 2005/1993) |
| Akidnognathidae, n. sp.    | 4               | 5               | 218    | 5.384 | USNM 412421                     |
| <i>Akidnognathus</i>       | 4               | 5               | 150    | 5.010 | BP/1/499                        |
| <i>Promoschorhynchus</i>   | 4               | 6               | 125    | 4.828 | RC 116                          |
| <i>Olivierosuchus</i>      | 4               | 7               | 122    | 4.804 | NMQR 3605                       |
| <i>Euchambersia</i>        | 4               | 5               | 115    | 4.744 | NHMUK R5696                     |
| <i>Cerdosuchooides</i>     | 4               | 6               | 134    | 4.897 | RC 58                           |
| <i>Moschorhinus</i>        | 4               | 6               | 260    | 5.560 | BP/1/3983                       |
| Unnamed clade (CR5)        |                 |                 |        |       |                                 |
| Hofmeyriidae, new sp.      | 5               | 5               | 60     | 4.094 | SAM-PK-K8516                    |
| <i>Hofmeyria</i>           | 5               | 3               | 89     | 4.488 | SAM-PK-10525                    |
| <i>Mirotenthes</i>         | 5               | 5               | 110    | 4.700 | UCMP 40467                      |
| <i>Ictidostoma</i>         | 5               | 3               | 74     | 4.304 | CGS CM86-258                    |
| <i>Ictidochampsia</i>      | 5               | 6               | 115    | 4.744 | RC 69                           |
| <i>Viatkosuchus</i>        | 5               | 4               | 170    | 5.135 | Tatarinov [74] (PIN 2212/13)    |
| <i>Moschowhaisia</i>       | 5               | 6               | 250*   | 5.521 | Ivakhnenko [73] (PIN 1100/20)   |
| <i>Theriognathus</i>       | 5               | 5               | 336    | 5.817 | BP/1/4008                       |
| Ictidosuchidae (CR6)       |                 |                 |        |       |                                 |
| <i>Ictidosuchus</i>        | 6               | 4               | 150    | 5.010 | SAM-PK-K10650                   |
| <i>Ictidosuchooides</i>    | 6               | 3               | 146    | 4.983 | SAM-PK-K6886                    |
| <i>Regisaurus</i> (CR7)    | 7               | 7               | 123    | 4.812 | CGS AK86/7                      |
| Unnamed clade (CR8)        |                 |                 |        |       |                                 |
| <i>Karenites</i>           | 8               | 4               | 100*   | 4.605 | Ivakhnenko [73] (PIN 2212/93)   |
| Zambian karenitid          | 8               | 5               | 77     | 4.343 | NHCC LB44                       |
| <i>Lycideops</i>           | 8               | 6               | 210    | 5.347 | NHMUK R5695                     |
| <i>Choerosaurus</i>        | 8               | 4               | 89     | 4.488 | SAM-PK-8797                     |
| <i>Tetracynodon tenuis</i> | 8               | 6               | 63     | 4.143 | RC 89                           |
| <i>Tetracynodon darti</i>  | 8               | 7               | 75     | 4.317 | UCMP 42869                      |
| <i>Scaloposaurus</i> (CR9) | 9               | 7               | 67     | 4.204 | NMQR 3323                       |
| Ericiolacertidae (CR10)    |                 |                 |        |       |                                 |
| <i>Ericiolacerta</i>       | 10              | 7               | 59     | 4.077 | BP/1/4794                       |
| <i>Silphedosuchus</i>      | 10              | 7               | 35*    | 3.555 | Ivakhnenko [73] (PIN 951/100)   |
| Ordosiidae (CR11)          |                 |                 |        |       |                                 |
| <i>Ordosiodon</i>          | 11              | 9               | 101    | 4.615 | Hou [75] (IVPP V4786)           |
| <i>Hazhenia</i>            | 11              | 8               | 157    | 5.056 | Sun and Hou [76] (IVPP V5866)   |
| Bauriidae (CR12)           |                 |                 |        |       |                                 |
| <i>Bauria</i>              | 12              | 9               | 130    | 4.867 | AMNH FR 5622                    |
| <i>Microgomphodon</i>      | 12              | 8               | 87     | 4.465 | SAM-PK-K10160                   |

|                               | CR  | AR | MaxBSL | lnBSL | Voucher specimen/Source                                                           |
|-------------------------------|-----|----|--------|-------|-----------------------------------------------------------------------------------|
| Cynodontia                    |     |    |        |       |                                                                                   |
| Basal cynodont, n. sp.        | n/a | 6  | 185    | 5.220 | SAM-PK-K10702                                                                     |
| <i>Charassognathus</i> (CR1)  | 1   | 4  | 63     | 4.143 | SAM-PK-K10369                                                                     |
| <i>Dvinia</i> (CR2)           | 2   | 6  | 88     | 4.477 | PIN 2005/2469                                                                     |
| <i>Procynosuchus</i> (CR3)    | 3   | 4  | 60     | 4.094 | SAM-PK-K10138                                                                     |
| Galesauridae (CR4)            |     |    |        |       |                                                                                   |
| <i>Cynosaurus</i>             | 4   | 5  | 48     | 3.871 | BP/1/1563                                                                         |
| <i>Galesaurus</i>             | 4   | 7  | 120    | 4.787 | NMQR 860                                                                          |
| <i>Progalesaurus</i>          | 4   | 7  | 93     | 4.532 | SAM-PK-K9954                                                                      |
| <i>Thrinaxodon</i> (CR5)      | 5   | 7  | 100    | 4.605 | SAM-PK-K1461                                                                      |
| <i>Platycraniellus</i> (CR6)  | 6   | 7  | 84     | 4.430 | Abdala [77] (TM 25)                                                               |
| Cynognathia (CR7)             |     |    |        |       |                                                                                   |
| <i>Cynognathus</i>            | 7   | 8  | 330    | 5.799 | SAM-PK-11484                                                                      |
| <i>Diademodon</i>             | 7   | 9  | 265    | 5.579 | BP/1/3754                                                                         |
| <i>Sinognathus</i>            | 7   | 9  | 121    | 4.795 | Abdala et al. [78] (IVPP V2339)                                                   |
| <i>Beishanodon</i>            | 7   | 8  | 232*   | 5.446 | Gao et al. [79] (PKUP V3007)                                                      |
| <i>Trirachodon</i>            | 7   | 8  | 105    | 4.653 | SAM-PK-K10762                                                                     |
| <i>Langbergia</i>             | 7   | 8  | 115    | 4.744 | BP/1/5362                                                                         |
| <i>Cricodon</i>               | 7   | 9  | 160    | 5.075 | Abdala et al. [78] (BP/1/5540)                                                    |
| <i>Luangwa</i>                | 7   | 9  | 142    | 4.955 | BP/1/3731                                                                         |
| <i>Dadadon</i>                | 7   | 10 | 143    | 4.962 | Ranivoharimanana et al. [60] (FMNH PR2232)                                        |
| <i>Massetognathus</i>         | 7   | 10 | 204    | 5.318 | Abdala and Giannini [80] (PULR11)                                                 |
| <i>Protuberum</i>             | 7   | 10 | 200    | 5.298 | Reichel et al. [81] (MGB 368-100)                                                 |
| <i>Exaeretodon</i>            | 7   | 11 | 400    | 5.991 | Abdala et al. [82] (MCZ 4486)                                                     |
| <i>Lumkuia</i> (CR8)          | 8   | 9  | 58     | 4.060 | BP/1/2669                                                                         |
| Unnamed clade (CR9)           |     |    |        |       |                                                                                   |
| <i>Ecteninion</i>             | 9   | 11 | 98     | 4.584 | Martinez et al. [83] (PVSJ 422)                                                   |
| <i>Trucidocynodon</i>         | 9   | 11 | 187    | 5.231 | Oliveira et al. [58] (UFRGS PV1051T)                                              |
| Chiniquodontidae (CR10)       |     |    |        |       |                                                                                   |
| <i>Chiniquodon</i>            | 10  | 10 | 310    | 5.736 | Abdala and Giannini [84] (UFRGS PV0122T)                                          |
| <i>Aleodon</i>                | 10  | 9  | 156    | 5.049 | Abdala and Smith [85] (GSN EN3)                                                   |
| <i>Probainognathus</i> (CR11) | 11  | 10 | 83     | 4.418 | Romer [86]; Sidor [52] (MCZ 4277)                                                 |
| <i>Therioherpeton</i> (CR12)  | 12  | 11 | 33*    | 3.496 | Oliveira [87] (MVP05.22.04)                                                       |
| Ictidosauria (CR13)           |     |    |        |       |                                                                                   |
| <i>Riograndia</i>             | 13  | 12 | 35     | 3.555 | Bonaparte et al. [88]; Soares et al. [89] (MCN PV2264; UFRGS PV0569T)             |
| <i>Chalimimia</i>             | 13  | 13 | 48     | 3.871 | Martinelli and Rougier [90] (PVL 3257)                                            |
| <i>Elliotherium</i>           | 13  | 13 | 58     | 4.060 | BP/1/6106                                                                         |
| Brasilodontidae (CR14)        |     |    |        |       |                                                                                   |
| <i>Brasilodon</i>             | 14  | 12 | 26     | 3.258 | Bonaparte et al. [91] (UFRGS PV0628T)                                             |
| <i>Brasilitherium</i>         | 14  | 12 | 27     | 3.295 | Bonaparte et al. [92] (UFRGS PV0929T)                                             |
| Mammaliaformes (CR15)         |     |    |        |       |                                                                                   |
| <i>Sinoconodon</i>            | 15  | 13 | 37     | 3.610 | Patterson and Olson [93]; Crompton and Sun [94] (IVPP 4727; IVPP 8683; IVPP 8692) |
| <i>Morganucodon</i>           | 15  | 13 | 26*    | 3.258 | Kermack et al. [95]                                                               |

CR, clade rank; AR, age rank;

Asterisk (\*) denotes estimated measurement from literature source;

† CR values correspond to side branches designated in Figure 3;

‡ AR values correspond to: 1, Wordian (Middle Permian) *Eodicynodon* AZ; 2, Capitanian (Middle Permian) *Tapinocephalus* AZ; 3, Capitanian-Wuchiapingian (Middle-Late Permian) *Pristerognathus* AZ; 4, Wuchiapingian (early Late Permian) *Tropidostoma* AZ; 5, Wuchiapingian (Late Permian) *Cistecephalus* AZ; 6, Wuchiapingian-Changxingian (Late Permian) *Dicynodon* AZ; 7, Induan-Olenekian (Early Triassic) *Lystrosaurus* AZ; 8, Olenekian (late Early Triassic) *Cynognathus* subzone A; 9, Anisian (early Middle Triassic) *Cynognathus* subzones B-C; 10, Ladinian (late Middle Triassic); 11, Carnian (early Late Triassic); 12, Norian (Late Triassic); 13, Rhaetian (latest Triassic).

## Supplemental References

72. Abdala F, Rubidge BS, van den Heever J (2008) The oldest therocephalians (Therapsida, Eutheriodontia) and the early diversification of Therapsida. *Palaeontology* 51:1011–1024.
73. Ivakhnenko MF (2011) Permian and Triassic Therocephals (Eutherapsida) of Eastern Europe. *Paleontological Journal* 45:981–1144.
74. Tatarinov LP (1995) *Viatkosuchus sumini*, a new Late Permian therocephalian from the Kirov region. *Paleontological Journal* 29:111–128.
75. Hou L (1979) On a new theriodont from Inner Mongolia. *Vertebrata Palasiatica* 17:121-130.
76. Sun A, Hou L (1981) *Hazhenia*, a new genus of Scaloposauria. *Acta Palaeontologica Sinica* 20:297–311.
77. Abdala F (2007) Redescription of *Platycraniellus elegans* (Therapsida, Cynodontia) from the Lower Triassic of South Africa, and the cladistic relationships of eutheriodonts. *Palaeontology* 50:591–618.
78. Abdala F, Hancox PJ, Neveling J (2005) Cynodonts from the uppermost Burgersdorp Formation, South Africa, and their bearing on the biostratigraphy and correlation of the Triassic *Cynognathus* Assemblage Zone. *J Vertebr Paleontol* 25:192–199.

79. Gao K, Fox RC, Zhou CF, Li DQ (2010) A new nonmammalian eucynodont (Synapsida, Therapsida) from the Triassic of northern Gansu Province, China, and its biostratigraphic and biogeographic implications. *American Museum Novitates* 3685:24 pp.
80. Abdala F, Giannini NP. 2000. Gomphodont cynodonts of the Chañares Formation: the analysis of an ontogenetic sequence. *J Vertebr Paleontol* 20:501–506.
81. Reichel M, Schultz CL, Soares MB (2009) A new traversodontid cynodont (Therapsida, Eucynodontia) from the Middle Triassic Santa Maria Formation of Rio Grande do Sul, Brazil. *Palaeontology* 52:229–250.
82. Abdala F, Barberena MC, Dornelles J (2002) A new species of the traversodontid cynodont *Exaeretodon* from the Santa Maria Formation (Middle/Late Triassic) of southern Brazil. *J Vertebr Paleontol* 22:313–325.
83. Martinez RN, May CL, Forster CA (1996) A new carnivorous cynodont from the Ischigualasto Formation (Late Triassic, Argentina), with comments on eucynodont phylogeny. *J Vertebr Paleontol* 16:271–284.
84. Abdala F, Giannini NP (2002) Chiniquodontid cynodonts: systematic and morphometric considerations. *Palaeontology* 45:1151–1170.
85. Abdala F, Smith RMH (2009) A Middle Triassic cynodont fauna from Namibia and its implications for the biogeography of Gondwana. *J Vertebr Paleontol* 29:837–851.
86. Romer AS (1970) The Chañares (Argentina) Triassic reptile fauna. VI. A cynodont with an incipient squamosal-dentary articulation. *Breviora* 344:1–18.
87. Oliveira EV (2006) Reevaluation of *Therioherpeton cargini* Bonaparte & Barberena, 1975 (Probainognathia, Therioherpetidae) from the Upper Triassic of Brazil. *Geodiversitas* 28:447–465.

88. Bonaparte JF, Ferigolo J, Ribeiro AM (2001) A primitive Late Triassic 'ictidosaur' from Rio Grande do Sul, Brazil. *Palaeontology* 44:623–635.
89. Soares MB, Schultz CL, Horn BL (2011) New information on *Riograndia guaibensis* Bonaparte, Ferigolo & Ribeiro, 2001 (Eucynodontia, Tritheledontidae) from the Late Triassic of southern Brazil: anatomical and biostratigraphic implications. *Anais da Academia Brasileira de Ciências* 83:329–354.
90. Martinelli AG, Rougier GW (2007) On *Chalimonia musteloides* (Eucynodontia: Tritheledontidae) from the Late Triassic of Argentina, and a phylogeny of Ictidosauria. *J Vertebr Paleontol* 27:442–460.
91. Bonaparte JF, Martinelli AG, Schultz CL, Rubert R (2003) The sister group of mammals: small cynodonts from the Late Triassic of southern Brazil. *Revista Brasileira de Paleontologia* 5:5-27.
92. Bonaparte JF, Martinelli AG, Schultz CL (2005) New information on *Brasilodon* and *Brasilitherium* (Cynodontia, Probainognathia) from the Late Triassic of southern Brazil. *Revista Brasileira de Paleontologia* 8:25–46.
93. Patterson B, Olson EC (1961) A triconodont mammal from the Triassic of Yunnan. *International Colloquium on the Evolution of Lower and Non Specialized Mammals*. Koninklijke Vlaamse Academie voor Wetenschappen, Letteren en Schone Kunsten van België 129–191.
94. Crompton AW, Sun AL (1985) Cranial structure and relationships of the Liassic mammal *Sinoconodon*. *Zool J Linn Soc* 85:99–119.
95. Kermack KA, Mussett F, Rigney HW (1981) The skull of *Morganucodon*. *Zool J Linn Soc* 71:1–158.
